# Supplementary material for: Ion conduction and phase behaviour in dual cation polyelectrolyte blends for sodium-ion batteries
Source: Royal Society of Chemistry journal article supplement (doi:10.1039/d3lp00245d), 2024-01-01

# Ion conduction and phase behaviour in dual cation polyelectrolyte blends for sodium ion batteries.

Sneha Malunavar<sup>1</sup>, Luca Porcarelli<sup>\*12</sup>, Patrick C. Howlett, David Mecerreyes<sup>23</sup>, Maria Forsyth<sup>\*123</sup>.

<sup>1</sup>Institute for Frontier Materials (IFM) Deakin University, Burwood Victoria 3125, Australia

<sup>2</sup>Polymat, University of the Basque Country UPV/EHU, Joxe Mari Korta Center, Avda, Tolosa 7, 20018 Donostia-San Sebastian, Spain

<sup>3</sup>Ikerbasque, Basque Foundation for Science, 48013, Bilbao, Spain

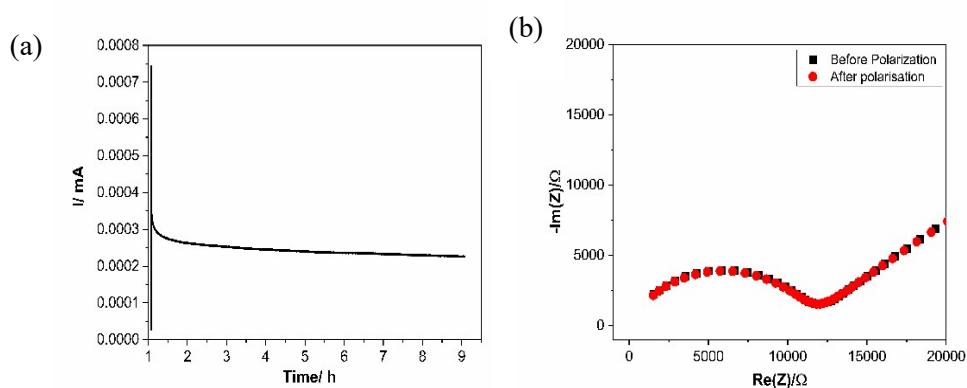

Figure S1: Electrochemistry studies of 50:50 mol% polymer blend of poly-P<sub>11114</sub>MTFSI and poly-NaMTFSI with 30 wt% NaFSI as plasticizer assembled with Na/Na symmetric cell at 70 °C (a) Current-time curve following a DC polarization (10 mV) of 50 mol% polymer blend with NaFSI plasticizer (b) Nyquist plot of the cell before and after polarisation.

Figure S2: Raw data of Tg determination 1: 10% NaFSI addition, 2: 20% NaFSI addition and 3: 30% NaFSI addition.

(1)

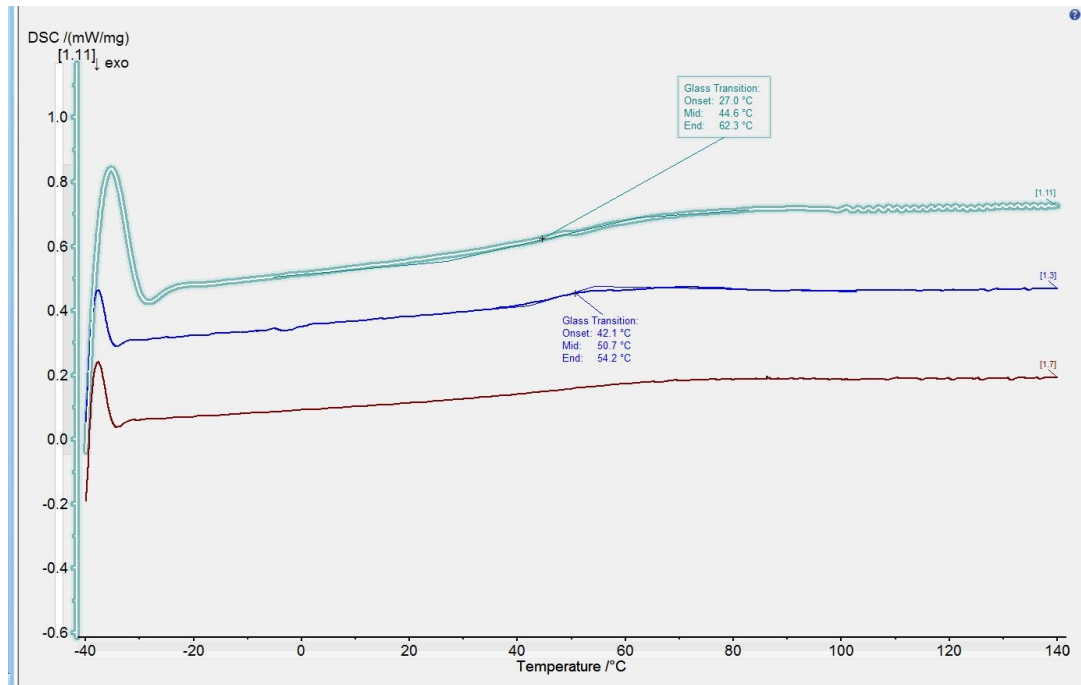

(2)

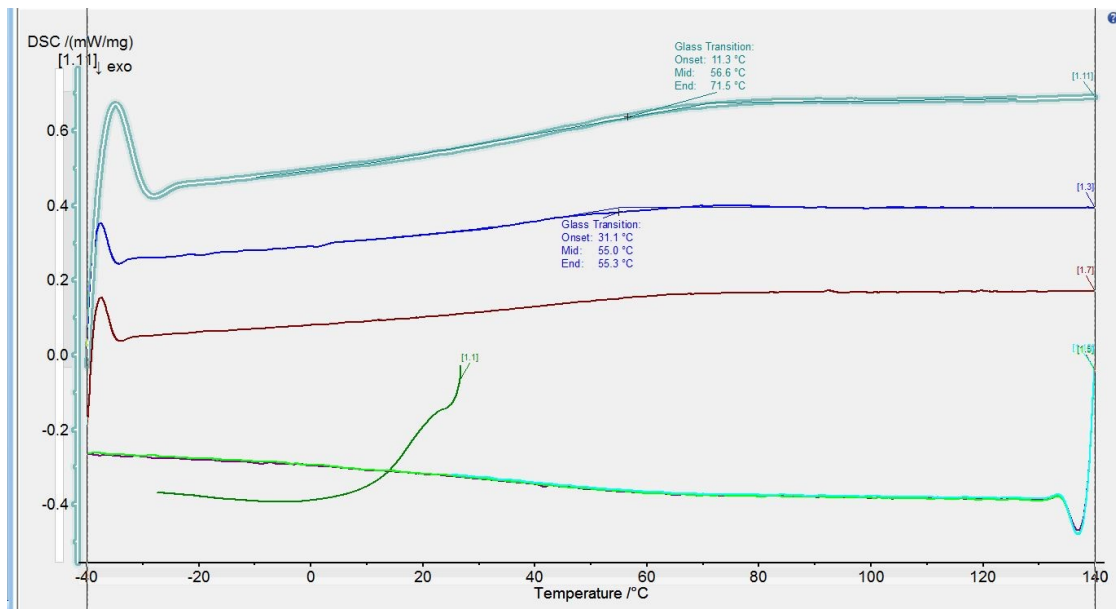

(3)

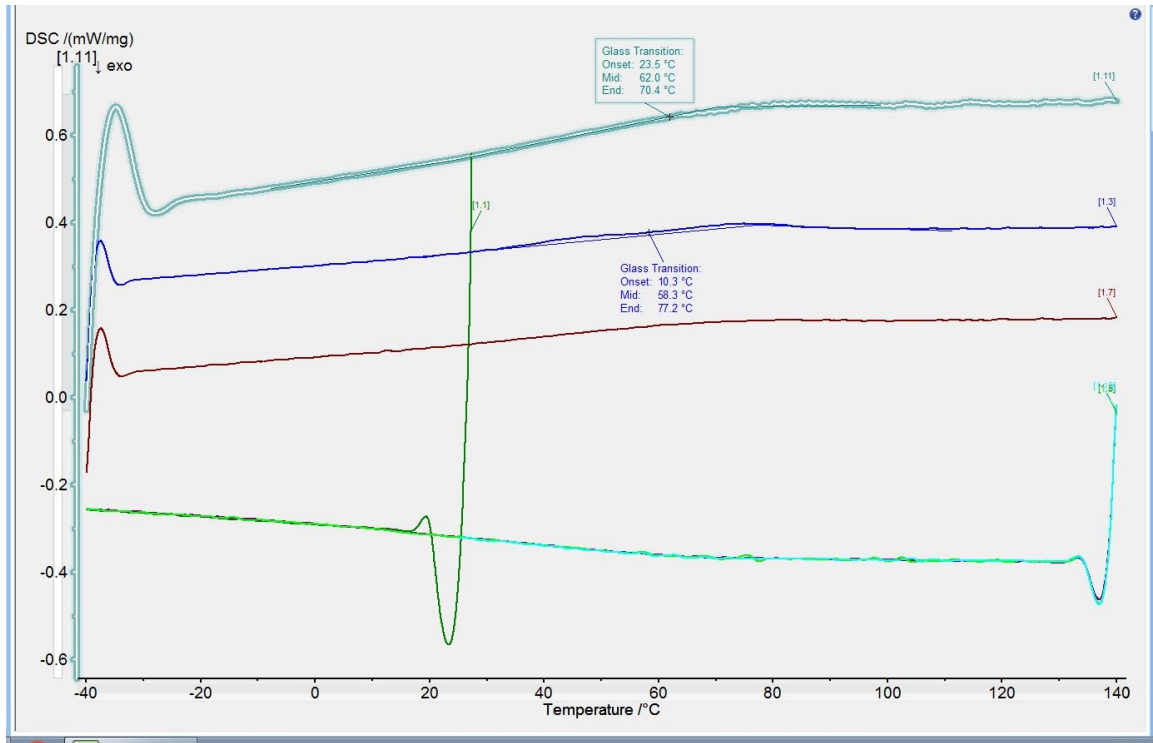

Figure S3:  $^1\text{H}$ -NMR spectra of (1) poly-NaMTFSI (2) poly-P<sub>111i4</sub>MTFSI and (3) poly-P<sub>122i4</sub>MTFSI

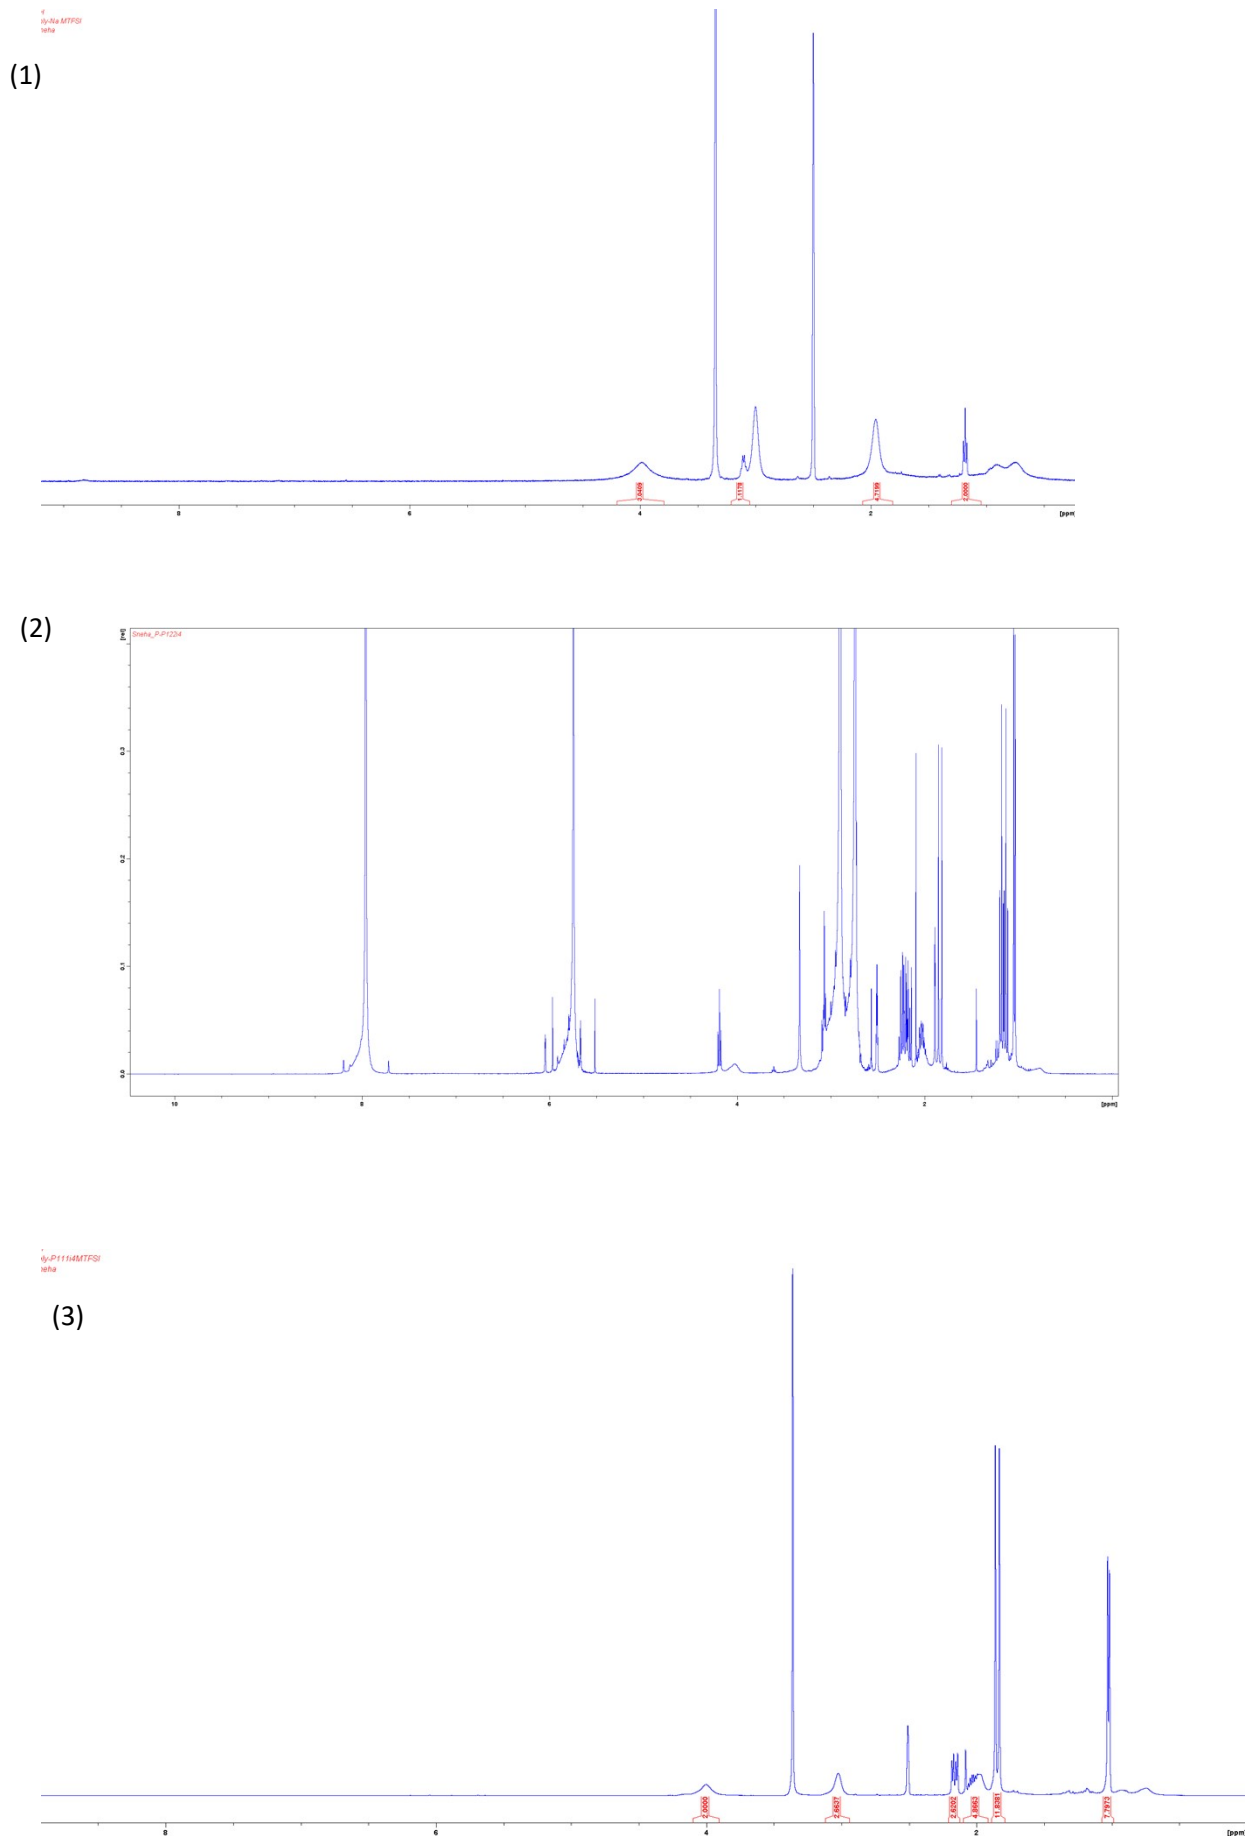

Supplement: d3lp00245d1.pdf [file d3lp00245d1.pdf]
